# Supplementary material for: Functional roles of hnRNPA2/B1 regulated by METTL3 in mammalian embryonic development
Source: PubMed Central journal article supplement (PMC6572863; doi:10.1038/s41598-019-44714-1), 2019-06-14
Supplement: 41598_2019_44714_MOESM1_ESM.pdf [file 41598_2019_44714_MOESM1_ESM.pdf]

## **Supplementary Information's for**

### **Functional roles of hnRNPA2/B1 regulated by METTL3 in mammalian embryonic development**

**Jeongwoo Kwon<sup>1</sup>, Yu-Jin Jo<sup>2</sup>, Suk Namgoong<sup>1\*</sup> and Nam-Hyung Kim<sup>1\*</sup>**

<sup>1</sup>Department of Animal Sciences, Chungbuk National University, Gaesin-dong, Cheongju, Chungbuk. 361-763, Republic of Korea

<sup>2</sup>Primate Resources Center (PRC), Korea Research Institute of Bioscience and Biotechnology (KRIBB), Jeongeup-si, Jeollabuk-do, 56216, Republic of Korea

\*Correspondence to [Suknamgoong@gmail.com](mailto:Suknamgoong@gmail.com) or nhkim@chungbuk.ac.kr

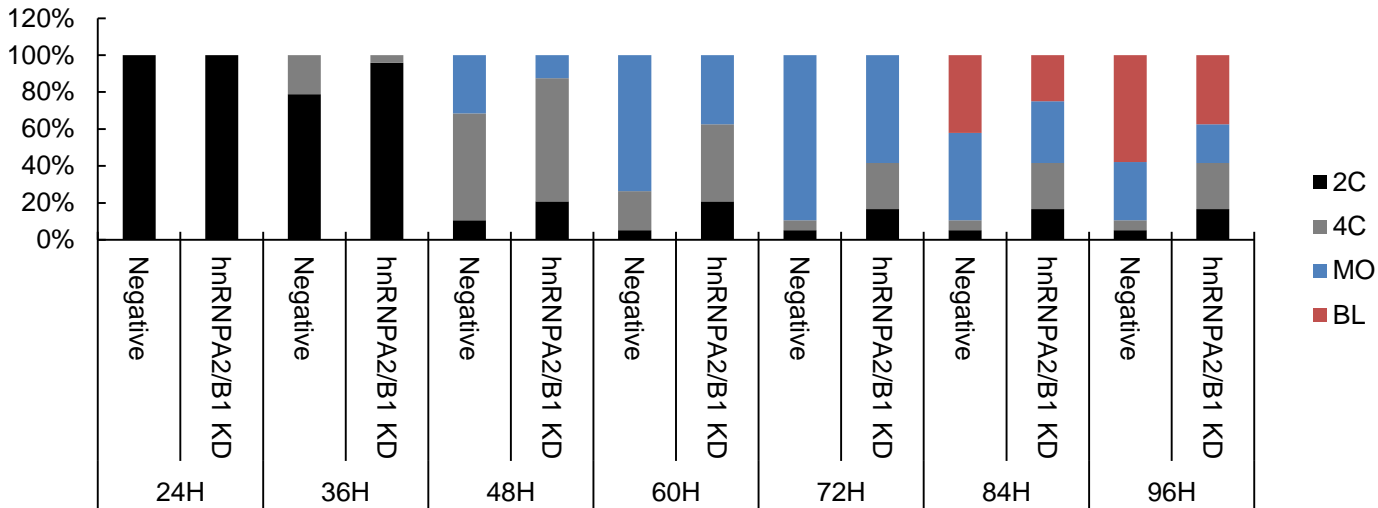

**Supplementary Figure 1.** Developmental delay of hnRNPA2/B1 KD embryos. Developmental competence was observed by time-lapse microscopy at 24 h after injection of eGFP dsRNA (negative) and hnRNPA2/B1 dsRNA (hnRNPA2/B1 KD) into zygotes. Experiments were repeated three times for each group. Developmental stage was evaluated at the 2C, 4C, morula, and blastocyst stages and evaluated by chromatin status.

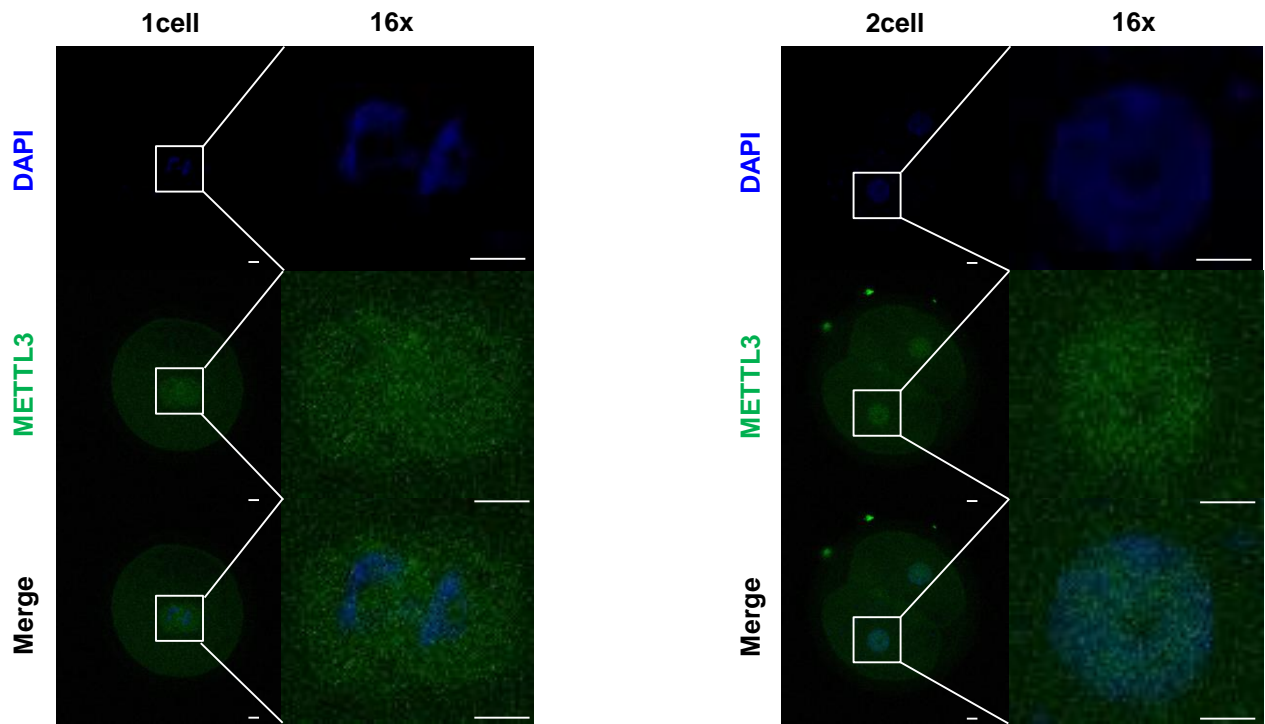

**Supplementary Figure 2.** Localization of METTL3 in 1cell and 2cell embryos using confocal microscopy. METTL3 localized at the nucleus during early embryo development. Scale bar = 10  $\mu$ m

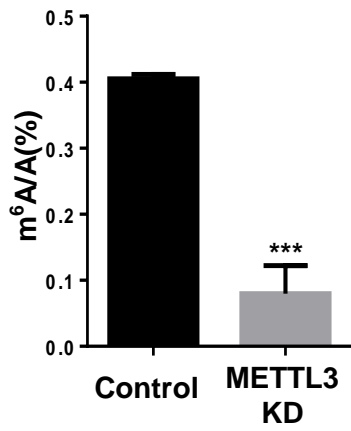

**Supplementary Figure 3.** Quantification of m6A RNA methylation in control and METTL3 knockdown blastocysts. One hundred blastocysts were examined in each group for total RNA isolation.
